# Supplementary material for: Design of a Nutritional Survey to Detect High Dietary Salt Intakes and Its Usefulness in Primary Care Compared to 24-Hour Urine Sodium Determination
Source: MDPI journal article supplement (doi:10.3390/nu15061542), 2023-03-22
Supplement: s1 [file s1]

*Table S1.*

*Foods highly correlated with salt intake.*

| FOODS                                                                                           |
|-------------------------------------------------------------------------------------------------|
| Milk (1 glass or cup, 200 cc)                                                                   |
| Skimmed yogurt (one, 125 grams)                                                                 |
| Cottage cheese, white or fresh cheese (one serving or serving)                                  |
| Cured, semi-cured, or creamy cheese (one piece)                                                 |
| Cured Extremaduran cheeses: Ibores, Casar (piece, portion)                                      |
| Eggs (1 egg)                                                                                    |
| Game meat (medium dish)                                                                         |
| Ham (2 strips)                                                                                  |
| Chicken (1 medium plate or piece)                                                               |
| Veal, pork, lamb as main course<br>(1 medium plate or piece)                                    |
| Sausages: sausage, salami, mortadella (50 g serving)                                            |
| Sausages and the like (one medium)                                                              |
| Pâtés, foie gras (half serving)                                                                 |
| Bacon, bacon, bacon (2 strips or slices)                                                        |
| Assorted fried fish (1 medium dish or serving)                                                  |
| Boiled or grilled fish: hake, sole, sea bream, emperor, salmon, bonito, tuna(1 dish or serving) |
| Other oily fish: mackerel, sardines, anchovy/anchovies                                          |
| A small can of preserves: tuna, bonito, sardines, mackerel                                      |
| Salted and/or smoked fish: anchovies, cod<br>(half serving)                                     |
| Cooked spinach or chard (1 medium dish)                                                         |
| Cabbage, cauliflower, cooked broccoli (1 medium dish)                                           |
| Artichokes (1 medium plate, 1 tin)                                                              |
| Lettuce, endive, endive (1 medium dish)                                                         |
| Tomato (one medium)                                                                             |
| Onion (one medium)                                                                              |
| Carrot, pumpkin (one or small plate)                                                            |
| Cooked green beans (1 course)                                                                   |
| Peppers (one)                                                                                   |
| Legumes: lentils, chickpeas, pinto or white beans, cooked, stew (1 medium dish)                 |
| Soup or vegetable puree (a dish)                                                                |
| Chicken croquettes, ham (one)                                                                   |
| Fried fish sticks or delicacies (one)                                                           |
| White bread (One small piece/3 mold slices/60 g)                                                |
| French fries (1 serving or plate)                                                               |
| Boiled, roasted potatoes (1 medium potato)                                                      |
| Potato chip bag (1 small bag)                                                                   |
| Cooked rice (1 medium dish)                                                                     |
| Pasta: spaghetti, noodles, macaroni and similar (1 dish)                                        |
| Pizza (1 slice or serving)                                                                      |
| Vegetable oil/olive (1tablespoon)                                                               |
| Cookies: Maria type, chocolate (1 cookie)                                                       |
| Pastries: croissant, donut, muffin, sponge cake, cake or similar (one or portion)               |
| Beer (one cane or bottle 1/5, 200 cc)                                                           |
| Olives (a plate or lid of about 15 small units)                                                 |
| Nuts: almonds, peanuts, pine nuts, hazelnuts (1 plate or sachet, 30g)                           |
| Salt added to dishes on the table (1 pinch or pinch)                                            |
| Paprika (1 pinch or a pinch)                                                                    |
| Mayonnaise (1 tablespoon)                                                                       |
| Ketchup (1spoon)                                                                                |

Table S2

***Present comorbidities and monitoring of diets.***

| Point out if you have any of the following <b>conditions or diseases</b>                                                                                  | Are you following any "slimming <b>regimen/weight loss diet</b> " or " <b>special diets for medical conditions</b> "?<br>Point out the <b>reason</b> (you can check more than one)                                                                                          |
|-----------------------------------------------------------------------------------------------------------------------------------------------------------|-----------------------------------------------------------------------------------------------------------------------------------------------------------------------------------------------------------------------------------------------------------------------------|
| <ul style="list-style-type: none"><li>○ DIABETES</li><li>○ HIGH CHOLESTEROL</li><li>○ HYPERTENSION</li><li>○ KIDNEY DISEASE</li><li>○ DIURETICS</li></ul> | <ul style="list-style-type: none"><li>○ NO</li><li>○ YES<ul style="list-style-type: none"><li>○ To control my blood sugar level</li><li>○ Because of cholesterol</li><li>○ For hypertension</li><li>○ For my kidney disease</li><li>○ To control weight</li></ul></li></ul> |

*Table S3. Nutritional Survey for the detection of high salt intakes.*

| FOODS                                                                                              | NEVER | 2-3 DAYS<br>PER<br>MONTH | 1 DAY<br>A<br>WEEK | 2-4<br>DAYS<br>A<br>WEEK | 5-6<br>DAYS<br>A<br>WEEK | 1<br>TIME<br>A<br>DAY | MORE<br>THAN 1<br>TIME<br>DAY |
|----------------------------------------------------------------------------------------------------|-------|--------------------------|--------------------|--------------------------|--------------------------|-----------------------|-------------------------------|
| Milk (1 glass or cup, 200 cc)                                                                      |       |                          |                    |                          |                          |                       |                               |
| Skimmed yogurt (one, 125 grams)                                                                    |       |                          |                    |                          |                          |                       |                               |
| Cottage cheese, white or fresh cheese (one serving or serving)                                     |       |                          |                    |                          |                          |                       |                               |
| Cured, semi-cured, or creamy cheese (one piece)                                                    |       |                          |                    |                          |                          |                       |                               |
| Cured Extremaduran cheeses: Ibores, Casar (piece, portion)                                         |       |                          |                    |                          |                          |                       |                               |
| Eggs (1 egg)                                                                                       |       |                          |                    |                          |                          |                       |                               |
| Game meat (medium dish)                                                                            |       |                          |                    |                          |                          |                       |                               |
| Ham (2 strips)                                                                                     |       |                          |                    |                          |                          |                       |                               |
| Chicken (1 medium plate or piece)                                                                  |       |                          |                    |                          |                          |                       |                               |
| Veal, pork, lamb as main course<br>(1 medium plate or piece)                                       |       |                          |                    |                          |                          |                       |                               |
| Sausages: sausage, salami, mortadella (50 g serving)                                               |       |                          |                    |                          |                          |                       |                               |
| Sausages and the like (one medium)                                                                 |       |                          |                    |                          |                          |                       |                               |
| Pâtés, foie gras (half serving)                                                                    |       |                          |                    |                          |                          |                       |                               |
| Bacon, bacon, bacon (2 strips or slices)                                                           |       |                          |                    |                          |                          |                       |                               |
| Assorted fried fish (1 medium dish or serving)                                                     |       |                          |                    |                          |                          |                       |                               |
| Boiled or grilled fish: hake, sole, sea bream, emperor, salmon,<br>bonito, tuna(1 dish or serving) |       |                          |                    |                          |                          |                       |                               |
| Other oily fish: mackerel, sardines, anchovy/anchovies                                             |       |                          |                    |                          |                          |                       |                               |
| A small can of preserves: tuna, bonito, sardines, mackerel                                         |       |                          |                    |                          |                          |                       |                               |
| Salted and/or smoked fish: anchovies, cod<br>(half serving)                                        |       |                          |                    |                          |                          |                       |                               |
| Cooked spinach or chard (1 medium dish)                                                            |       |                          |                    |                          |                          |                       |                               |
| Cabbage, cauliflower, cooked broccoli (1 medium dish)                                              |       |                          |                    |                          |                          |                       |                               |
| Artichokes (1 medium plate, 1 tin)                                                                 |       |                          |                    |                          |                          |                       |                               |
| Lettuce, endive, endive (1 medium dish)                                                            |       |                          |                    |                          |                          |                       |                               |
| Tomato (one medium)                                                                                |       |                          |                    |                          |                          |                       |                               |
| Onion (one medium)                                                                                 |       |                          |                    |                          |                          |                       |                               |
| Carrot, pumpkin (one or small plate)                                                               |       |                          |                    |                          |                          |                       |                               |
| Cooked green beans (1 course)                                                                      |       |                          |                    |                          |                          |                       |                               |
| Peppers (one)                                                                                      |       |                          |                    |                          |                          |                       |                               |
| Legumes: lentils, chickpeas, pinto or white beans, cooked,<br>stew (1 medium dish)                 |       |                          |                    |                          |                          |                       |                               |
| Soup or vegetable puree (a dish)                                                                   |       |                          |                    |                          |                          |                       |                               |
| Chicken croquettes, ham (one)                                                                      |       |                          |                    |                          |                          |                       |                               |
| Fried fish sticks or delicacies (one)                                                              |       |                          |                    |                          |                          |                       |                               |
| White bread (One small piece/3 mold slices/60 g)                                                   |       |                          |                    |                          |                          |                       |                               |
| French fries (1 serving or plate)                                                                  |       |                          |                    |                          |                          |                       |                               |
| Boiled, roasted potatoes (1 medium potato)                                                         |       |                          |                    |                          |                          |                       |                               |
| Potato chip bag (1 small bag)                                                                      |       |                          |                    |                          |                          |                       |                               |
| Cooked rice (1 medium dish)                                                                        |       |                          |                    |                          |                          |                       |                               |
| Pasta: spaghetti, noodles, macaroni and similar (1 dish)                                           |       |                          |                    |                          |                          |                       |                               |
| Pizza (1 slice or serving)                                                                         |       |                          |                    |                          |                          |                       |                               |
| Vegetable oil/olive (1tablespoon)                                                                  |       |                          |                    |                          |                          |                       |                               |
| Cookies: Maria type, chocolate (1 cookie)                                                          |       |                          |                    |                          |                          |                       |                               |
| Pastries: croissant, donut, muffin, sponge cake, cake or similar<br>(one or portion)               |       |                          |                    |                          |                          |                       |                               |
| Beer (one cane or bottle 1/5, 200 cc)                                                              |       |                          |                    |                          |                          |                       |                               |
| Olives (a plate or lid of about 15 small units)                                                    |       |                          |                    |                          |                          |                       |                               |
| Nuts: almonds, peanuts, pine nuts, hazelnuts (1 plate or<br>sachet, 30g)                           |       |                          |                    |                          |                          |                       |                               |
| Salt added to dishes on the table (1 pinch or pinch)                                               |       |                          |                    |                          |                          |                       |                               |
| Paprika (1 pinch or a pinch)                                                                       |       |                          |                    |                          |                          |                       |                               |
| Mayonnaise (1 tablespoon)                                                                          |       |                          |                    |                          |                          |                       |                               |
| Ketchup (1spoon)                                                                                   |       |                          |                    |                          |                          |                       |                               |
